# Supplementary material for: Automatic Prediction of Facial Trait Judgments: Appearance vs. Structural Models
Source: PLOS journal article supplement (doi:10.1371/journal.pone.0023323), 2011-08-17
Supplement: S1 (10.1371/journal.pone.0023323.s001) [file journal.pone.0023323.s001]

Figure §1.

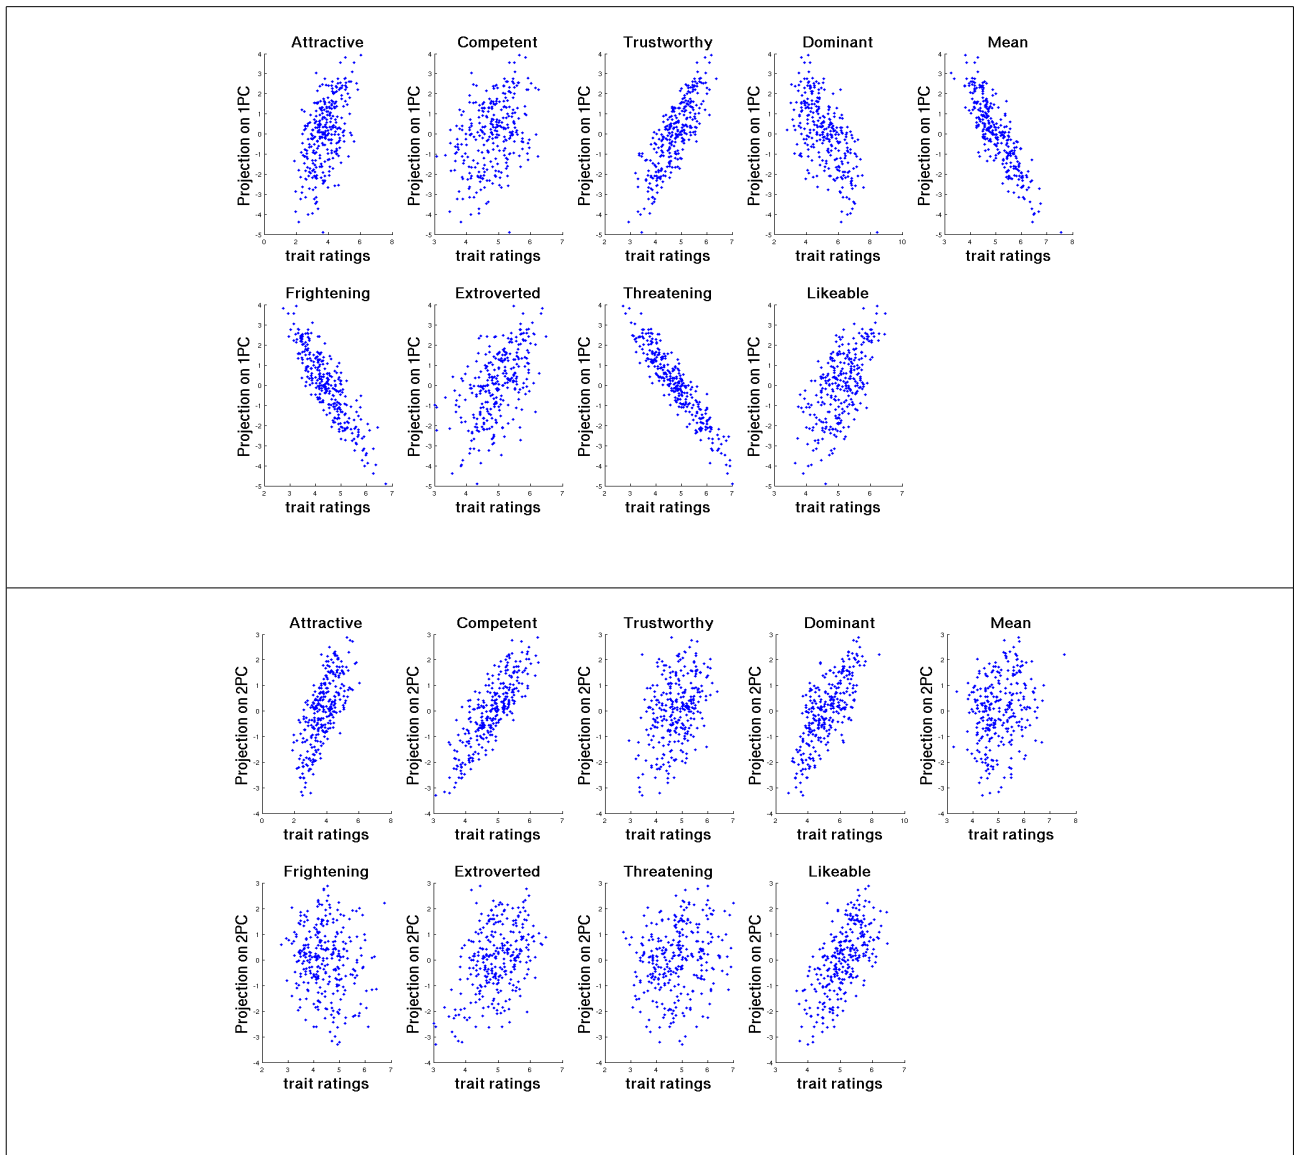

Scatter plots of the projections of judgments of the nine traits on the first two principal components derived from a PCA of the traits. It can be seen that each trait projects differently, in the case of *dominance* projects well to the second PC, where *mean* and *threatening* do not project that well hence using the information of each trait allows learning the specific features that make each trait unique.
